# Supplementary material for: Yersinia pestis Targets the Host Endosome Recycling Pathway during the Biogenesis of the Yersinia-Containing Vacuole To Avoid Killing by Macrophages
Source: PubMed Central journal article supplement (PMC5821078; doi:10.1128/mbio.01800-17), 2018-02-20
Supplement: mbo001183734st1.pdf [file mbo001183734st1.pdf]

| Table S1. Validated hits from whole genome screen. |             |                    |                     |
|----------------------------------------------------|-------------|--------------------|---------------------|
| Entrez Gene ID                                     | Gene Symbol | MGI Gene/Marker ID | Ensembl ID          |
| 66409                                              | Rsl1d1      | MGI:1913659        | ENSMUSG00000005846  |
| 74116                                              | Pi16        | MGI:1921366        | ENSMUSG000000024011 |
| 20336                                              | Exoc4       | MGI:1096376        | ENSMUSG000000029763 |
| 21787                                              | Tfg         | MGI:1338041        | ENSMUSG000000022757 |
| 54633                                              | Pqbp1       | MGI:1859638        | ENSMUSG000000031157 |
| 83672                                              | Sytl3       | MGI:1933367        | ENSMUSG000000041831 |
| 209456                                             | Trp53bp2    | MGI:2138319        | ENSMUSG000000026510 |
| 218952                                             | Fermt2      | MGI:2385001        | ENSMUSG000000037712 |
| 14064                                              | F2rl2       | MGI:1298208        | ENSMUSG000000021675 |
| 56284                                              | Mrpl19      | MGI:1926274        | ENSMUSG000000030045 |
| 213556                                             | Plekhh2     | MGI:2146813        | ENSMUSG000000040852 |
| 235330                                             | Ttc12       | MGI:2444588        | ENSMUSG000000040219 |
| 74143                                              | Opa1        | MGI:1921393        | ENSMUSG000000038084 |
| 98685                                              | Trmt1l      | MGI:1916185        | ENSMUSG000000053286 |
| 56096                                              | Plac1       | MGI:1926287        | ENSMUSG000000061082 |
| 74782                                              | Git8d2      | MGI:1922032        | ENSMUSG000000020251 |
| 56523                                              | Pmfbp1      | MGI:1930136        | ENSMUSG000000031727 |
| 56522                                              | Papolb      | MGI:1932115        | ENSMUSG000000074817 |
| 233489                                             | Picalm      | MGI:2385902        | ENSMUSG000000039361 |
| 22110                                              | Tspyl1      | MGI:1298395        | ENSMUSG000000047514 |
| 208177                                             | Phldb2      | MGI:2444981        | ENSMUSG000000033149 |
| 16174                                              | Il18rap     | MGI:1338888        | ENSMUSG000000026068 |
| 19340                                              | Rab3d       | MGI:97844          | ENSMUSG000000019066 |
| 17527                                              | Mpv17       | MGI:97138          | ENSMUSG000000090262 |
| 18143                                              | Npas2       | MGI:109232         | ENSMUSG000000026077 |
| 76308                                              | Rab1b       | MGI:1923558        | ENSMUSG000000024870 |
| 16678                                              | Krt1        | MGI:96698          | ENSMUSG000000046834 |
| 66681                                              | Pgm1        | MGI:97564          | ENSMUSG000000029171 |
| 215335                                             | Slc36a1     | MGI:2445299        | ENSMUSG000000020261 |
| 14997                                              | H2-M9       | MGI:1276570        | ENSMUSG000000067201 |
| 18641                                              | Pfkl        | MGI:97547          | ENSMUSG000000020277 |
| 19331                                              | Rab19       | MGI:103292         | ENSMUSG000000029923 |
| 17289                                              | Mertk       | MGI:96965          | ENSMUSG000000014361 |
| 71472                                              | Usp19       | MGI:1918722        | ENSMUSG000000006676 |
| 75530                                              | Lym7        | MGI:1922780        | ENSMUSG000000020268 |
| 18538                                              | Pcna        | MGI:97503          | ENSMUSG000000027342 |
| 20333                                              | Sec22b      | MGI:1338759        | ENSMUSG000000027879 |
| 227157                                             | Mpp4        | MGI:2386681        | ENSMUSG000000079550 |
| 19332                                              | Rab20       | MGI:102789         | ENSMUSG000000031504 |
| 231507                                             | Plac8       | MGI:2445289        | ENSMUSG000000029322 |
| 18071                                              | Nhlh1       | MGI:98481          | ENSMUSG000000051251 |
| 81500                                              | Sil1        | MGI:1932040        | ENSMUSG000000024357 |
| 58234                                              | Shank3      | MGI:1930016        | ENSMUSG000000022623 |
| 19341                                              | Rab4a       | MGI:105069         | ENSMUSG000000019478 |
| 20438                                              | Siah1b      | MGI:108063         | ENSMUSG000000040749 |
| 12266                                              | C3          | MGI:88227          | ENSMUSG000000024164 |
| 327814                                             | Ppfia2      | MGI:2443834        | ENSMUSG000000053825 |
| 67474                                              | Snap29      | MGI:1914724        | ENSMUSG000000022765 |
| 170719                                             | Oxr1        | MGI:2179326        | ENSMUSG000000022307 |
| 15387                                              | Hnrnpk      | MGI:99894          | ENSMUSG000000021546 |
| 77604                                              | Rbm12b2     | MGI:1924854        | ENSMUSG000000052137 |
| 238831                                             | Ppwd1       | MGI:2443069        | ENSMUSG000000021713 |
| 76338                                              | Rab2b       | MGI:1923588        | ENSMUSG000000022159 |
| 234852                                             | Chmp1a      | MGI:1920159        | ENSMUSG000000000743 |
| 269198                                             | Nbeal1      | MGI:2444343        | ENSMUSG000000073664 |
| 228775                                             | Trib3       | MGI:1345675        | ENSMUSG000000032715 |
| 18690                                              | Phxr5       | MGI:104521         |                     |
| 74053                                              | Grip1       | MGI:1921303        | ENSMUSG000000034813 |
| 268294                                             | Zbtb24      | MGI:3039618        | ENSMUSG000000019826 |
| 15002                                              | H2-Ob       | MGI:95925          | ENSMUSG000000041538 |
| 20195                                              | S100a11     | MGI:1338798        | ENSMUSG000000027907 |
| 76366                                              | Mtif3       | MGI:1923616        | ENSMUSG000000016510 |
| 18530                                              | Pcdh8       | MGI:1306800        | ENSMUSG000000036422 |
| 259100                                             | Olfir666    | MGI:3030500        | ENSMUSG000000063582 |
| 19110                                              | Pr14a1      | MGI:1206587        | ENSMUSG00000005891  |
| 18720                                              | Pip5k1a     | MGI:107929         | ENSMUSG000000028126 |
| 104776                                             | Aldh6a1     | MGI:1915077        | ENSMUSG000000021238 |
| 241035                                             | Pkhd1       | MGI:2155808        | ENSMUSG000000043760 |
| 19053                                              | Ppp2cb      | MGI:1321161        | ENSMUSG000000009630 |
| 18181                                              | Nrf1        | MGI:1332235        | ENSMUSG000000058440 |
| 18744                                              | Pja1        | MGI:1101765        | ENSMUSG000000034403 |
